# Supplementary material
Source: Royal Society of Chemistry journal article supplement (doi:10.1039/d6rp00072j)
Supplement: d6rp00072j3.pdf [file d6rp00072j3.pdf]

**Table S1. Included Studies After Second-Level Disciplinary Appraisal (n = 17)**

| Code | Author(s)          | Year | Journal / Source                                  | Educational Context                   | Study Type | Inclusion Rationale                                                                  |
|------|--------------------|------|---------------------------------------------------|---------------------------------------|------------|--------------------------------------------------------------------------------------|
| C1   | Ramadhani et al.   | 2024 | <i>Chemistry Teacher International</i>            | Chemistry learning (COVID transition) | Empirical  | Examines affective engagement and emotional responses in chemistry learning contexts |
| C2   | Agustian et al.    | 2025 | <i>Science Education</i>                          | Undergraduate chemistry laboratory    | Empirical  | Explicit analysis of epistemic affect during chemistry inquiry                       |
| C3   | Dori et al.        | 2018 | <i>International Journal of Science Education</i> | Context-based chemistry learning      | Empirical  | Links representational reasoning with metacognitive and affective processes          |
| C4   | Galloway & Bretz   | 2015 | <i>Journal of Chemical Education</i>              | Undergraduate chemistry laboratory    | Empirical  | Investigates affective experiences and meaningful learning in chemistry labs         |
| C5   | Galloway et al.    | 2016 | <i>Journal of Chemical Education</i>              | Undergraduate chemistry laboratory    | Empirical  | Examines students' emotional responsibility, control, and regulation                 |
| C6   | Kynnäräinen et al. | 2024 | <i>International Journal of Science Education</i> | Chemistry laboratory                  | Empirical  | Captures situational engagement and affect during experimental failure               |
| C7   | Yonai & Blonder    | 2022 | <i>Journal of Chemical Education</i>              | Inquiry-based chemistry (remote SEM)  | Empirical  | Focuses on emotional dimensions of inquiry practices                                 |
| C8   | Avargil & Piorko   | 2022 | <i>International Journal of Science Education</i> | Secondary chemistry                   | Empirical  | Addresses affective challenges in representational reasoning                         |
| S1   | Zembylas           | 2023 | <i>Educational Philosophy and Theory</i>          | Science education (theoretical)       | Conceptual | Provides sociocultural and affective theory relevant to EI                           |
| S2   | Sinatra et al.     | 2014 | <i>Educational Psychologist</i>                   | Science learning                      | Review     | Theorises epistemic emotions and conceptual change                                   |
| S3   | Muis et al.        | 2018 | <i>Contemporary Educational Psychology</i>        | Conceptual change learning            | Empirical  | Analyses epistemic emotions and regulation                                           |
| S4   | Pekrun &           | 2014 | <i>International</i>                              | Cross-disciplinary                    | Handbook   | Foundational framework                                                               |

|    |                    |      |                                                   |                             |           |                                                             |
|----|--------------------|------|---------------------------------------------------|-----------------------------|-----------|-------------------------------------------------------------|
|    | Linnenbrink-Garcia |      | <i>Handbook of Emotions in Education</i>          |                             |           | on epistemic emotions                                       |
| S5 | Jaber & Hammer     | 2016 | <i>Journal of the Learning Sciences</i>           | Science learning            | Empirical | Examines affective engagement in disciplinary participation |
| S6 | Schindler et al.   | 2017 | <i>IJETHE</i>                                     | Higher education            | Review    | Provides methodological insight on engagement and affect    |
| S7 | Tang               | 2016 | <i>International Journal of Science Education</i> | Science classroom discourse | Empirical | Connects discourse, representations, and affect             |
| S8 | Bellocchi          | 2019 | <i>Journal of Research in Science Teaching</i>    | Science teaching            | Empirical | Focuses on emotion regulation and social bonds              |
| S9 | Tyng et al.        | 2017 | <i>Frontiers in Psychology</i>                    | Neuroscience & learning     | Review    | Explains affect–cognition interaction relevant to EI        |

**Table S2. Excluded Studies After Eligibility and Disciplinary Appraisal (n = 15)**

| No. | Article title                                                                                                                                                               | Reason for exclusion                                                                                                 |
|-----|-----------------------------------------------------------------------------------------------------------------------------------------------------------------------------|----------------------------------------------------------------------------------------------------------------------|
| E1  | A brainstorming flipped classroom approach for improving students' learning performance, motivation, teacher–student interaction and creativity in a civics education class | Non-STEM discipline; no chemistry or science inquiry context                                                         |
| E2  | A Model for Emotional Intelligence in Biology Education Research                                                                                                            | Focused on biology education; lacks chemistry-specific epistemic practices                                           |
| E3  | A study on mindful agency's influence on college students' engagement                                                                                                       | General higher education context; no chemistry or science learning focus                                             |
| E4  | Anxiety in science education                                                                                                                                                | Broad science education review; not situated in chemistry or chemistry-related practices                             |
| E5  | Emotional intelligence of elementary scholar: Instructional strategy and personality tendency                                                                               | Elementary-level general education; no disciplinary chemistry context                                                |
| E6  | Evaluating the instructional efficacies of conceptual change models on students' conceptual change achievement in physics                                                   | Physics education focus; excluded to maintain chemistry disciplinary specificity                                     |
| E7  | Fostering self-regulation and...                                                                                                                                            | General self-regulated learning study; chemistry context not explicit                                                |
| E8  | Identifying what social emotional support first-year engineering students need to overcome setbacks in lab settings                                                         | Engineering education context; laboratory practices not chemistry-specific                                           |
| E9  | Linking COVID-19-related awareness and anxiety among teachers in Ghana                                                                                                      | Teacher wellbeing study; no chemistry learning or student epistemic focus                                            |
| E10 | Psychological capital relates with teacher enjoyment                                                                                                                        | Teacher affect study; not related to chemistry instruction or learning                                               |
| E11 | Resilience and psychological distress in the transition to university                                                                                                       | General student wellbeing; lacks chemistry disciplinary framing                                                      |
| E12 | Transformative impact of dramatic arts for Grade 12 academic excellence                                                                                                     | Arts-based intervention; no relevance to chemistry education                                                         |
| E13 | Unpacking the mediating role of classroom interaction among EFL learners                                                                                                    | Language education context; excluded for disciplinary misalignment                                                   |
| E14 | Identifying what social emotional support first-year engineering students need to overcome setbacks in lab settings                                                         | Identifying what social emotional support first-year engineering students need to overcome setbacks in lab settings  |
| E15 | The Effect of Problem Based Learning (PBL) Instruction on Students' Motivation and Problem Solving Skills of Physics                                                        | The Effect of Problem Based Learning (PBL) Instruction on Students' Motivation and Problem Solving Skills of Physics |
