# Supplementary material
Source: Royal Society of Chemistry journal article supplement (doi:10.1039/d6rp00072j)

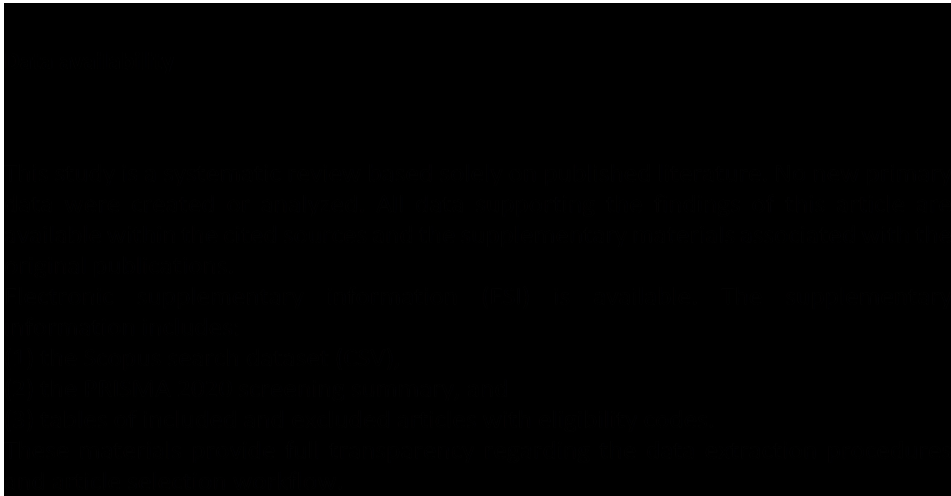

Supplement: d6rp00072j2.pdf [file d6rp00072j2.pdf]
